# Supplementary material for: micropan: an R-package for microbial pan-genomics
Source: Springer Nature journal article supplement (doi:10.1186/s12859-015-0517-0), 2015-03-11
Supplement: 12859_2015_517_MOESM1_ESM.pdf [file 12859_2015_517_MOESM1_ESM.pdf]

# Enterococcus faecalis pan-genome tree

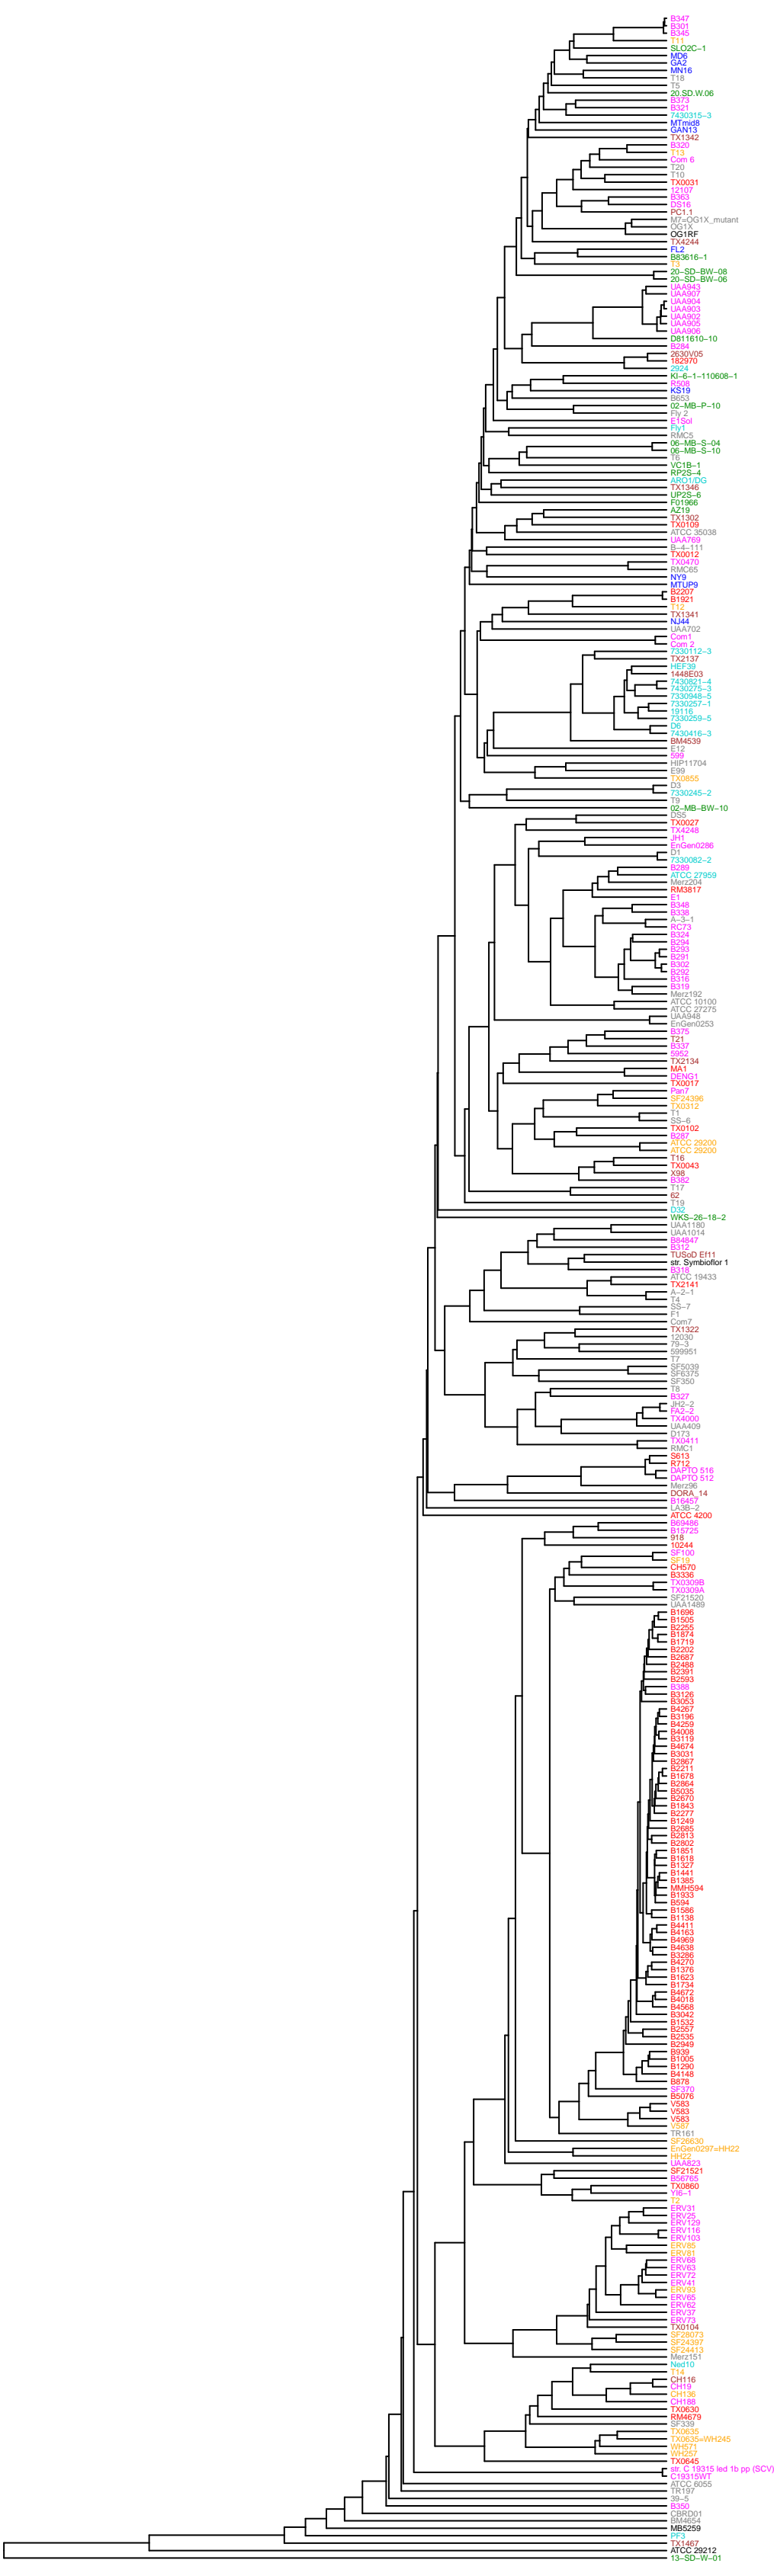

Manhattan distance
