# Supplementary material for: micropan: an R-package for microbial pan-genomics
Source: Springer Nature journal article supplement (doi:10.1186/s12859-015-0517-0), 2015-03-11

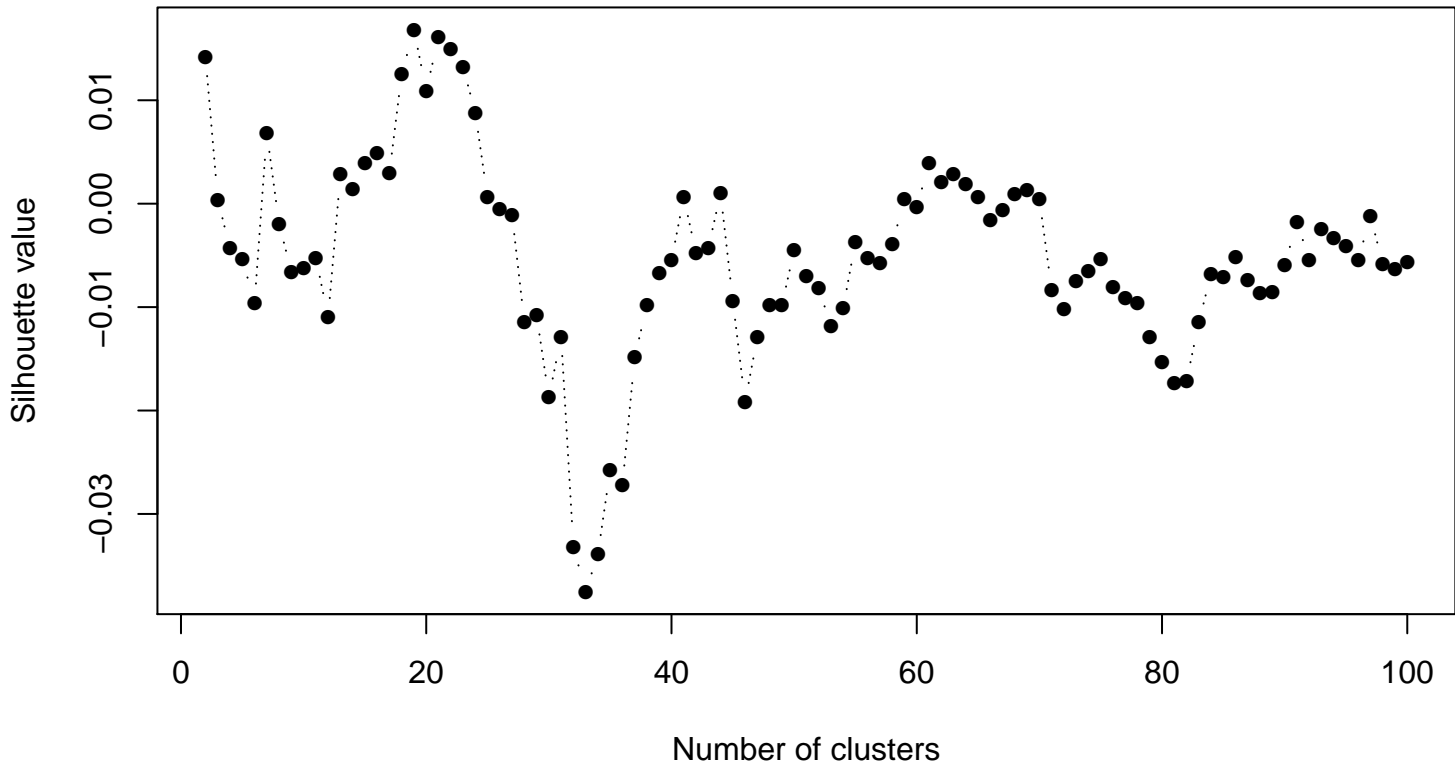

Supplement: 12859_2015_517_MOESM2_ESM.pdf [file 12859_2015_517_MOESM2_ESM.pdf]
